# Supplementary material for: Multidrug-Resistant Klebsiella pneumoniae Causing Severe Infections in the Neuro-ICU
Source: MDPI journal article supplement (doi:10.3390/antibiotics10080979), 2021-08-13
Supplement: s1 [file s1]

**Table S1.** Minimal inhibitory concentrations (MICs) of antimicrobials for *K. pneumoniae* clinical isolates.

| Isolate      | Patient | MICs of Antibacterials |     |     |     |     |     |     |     |      |     |      |      |       |     |     |     |     |      |      |      | Phenotype |
|--------------|---------|------------------------|-----|-----|-----|-----|-----|-----|-----|------|-----|------|------|-------|-----|-----|-----|-----|------|------|------|-----------|
|              |         | AMP                    | SAM | CXM | FOX | CRO | CAZ | SCF | FEP | ETP  | IPM | TET  | TGC  | CIP   | CHL | GEN | TOB | AMK | SXT  | NIT  | CST  |           |
| B-548/18     | D       | >32                    | >32 | >64 | >64 | >64 | >64 | >64 | >64 | >8   | 8   | >16  | >8   | >4    | >64 | >64 | >16 | >64 | >320 | 256  | <0.5 | XDR       |
| B-784/18     | D       | >32                    | >32 | >64 | >64 | >64 | >64 | >64 | >64 | >8   | 8   | >16  | >8   | >4    | >64 | >16 | >16 | >64 | >320 | 256  | <0.5 | XDR       |
| B-1154/18    | D       | >32                    | >32 | >64 | >64 | >64 | >64 | >64 | >64 | >8   | 4   | >16  | 4    | >4    | >64 | >16 | >16 | >64 | >320 | 128  | <0.5 | XDR       |
| B-1396/18-2  | J       | >32                    | >32 | >64 | >64 | >64 | >64 | >64 | >64 | ND   | 8   | >16  | 2    | >4    | >64 | >16 | >16 | <2  | >320 | >512 | <0.5 | XDR       |
| B-1618/18    | Q       | >32                    | >32 | >64 | 8   | >64 | >64 | >64 | >64 | 4    | <1  | >16  | 4    | >4    | >64 | <1  | >16 | <2  | >320 | 128  | <0.5 | XDR       |
| B-2035K/18-2 | P       | >32                    | >32 | >64 | >64 | >64 | >64 | >64 | >64 | 4    | <1  | >16  | >8   | >4    | >64 | >16 | >16 | >64 | 160  | 256  | <0.5 | XDR       |
| B-2062/18    | P       | >32                    | 16  | >64 | ND  | ND  | >64 | >64 | >64 | ND   | 2   | ND   | ND   | >4    | >64 | >16 | >16 | >64 | 160  | 256  | <0.5 | XDR       |
| B-2086/18    | P       | >32                    | >32 | >64 | >64 | >64 | >64 | >64 | >64 | 4    | <1  | >16  | >8   | >4    | >64 | >16 | >16 | >64 | 160  | 256  | <0.5 | XDR       |
| B-968/18-1   | M       | >32                    | >32 | >64 | >64 | >64 | >64 | >64 | >64 | >8   | <1  | >16  | 4    | >4    | >64 | <1  | 8   | <2  | 80   | 256  | <0.5 | XDR       |
| B-1120K/18   | M       | >32                    | >32 | >64 | >64 | >64 | >64 | >64 | >64 | >8   | <1  | >16  | 4    | >4    | >64 | <1  | 8   | <2  | 80   | 256  | <0.5 | XDR       |
| B-2625/18    | S       | >32                    | >32 | >64 | >64 | ND  | >64 | >64 | >64 | >8   | >16 | >16  | >8   | >4    | >64 | >16 | >16 | <2  | <20  | 128  | <0.5 | XDR       |
| B-14/19      | S       | >32                    | >32 | >64 | >64 | ND  | >64 | >64 | 32  | >8   | >16 | >16  | >8   | >4    | >64 | >16 | >16 | <2  | <20  | 128  | <0.5 | XDR       |
| B-21/19      | S       | >32                    | >32 | >64 | >64 | ND  | >64 | >64 | 32  | >8   | >16 | >16  | >8   | >4    | >64 | >16 | >16 | <2  | <20  | 128  | <0.5 | XDR       |
| B-1398/18-1  | L       | >32                    | 16  | >64 | <4  | >64 | 16  | <8  | 2   | <0.5 | <1  | >16  | 1    | <0.5  | >64 | <1  | <1  | <2  | >320 | 64   | <0.5 | XDR       |
| B-1406/18-1  | L       | >32                    | 16  | >64 | <4  | >64 | 16  | <8  | 2   | <0.5 | <1  | >16  | 1    | <0.5  | >64 | <1  | <1  | <2  | >320 | 64   | <0.5 | XDR       |
| B-1412/18-1  | L       | >32                    | 16  | >64 | <4  | >64 | 8   | <8  | 2   | <0.5 | <1  | >16  | 1    | <0.5  | >64 | <1  | <1  | <2  | >320 | 128  | <0.5 | XDR       |
| B-1230/18-1  | K       | >32                    | 4   | 2   | <4  | <1  | <1  | <8  | <1  | <0.5 | <1  | <0.5 | <0.5 | <0.25 | 32  | <1  | <1  | <2  | <20  | 256  | <0.5 | R         |
| B-849/18-2   | K       | 16                     | 4   | 2   | <4  | <1  | <1  | <8  | <1  | <0.5 | <1  | <0.5 | <0.5 | <0.25 | >64 | <1  | <1  | <2  | <20  | 128  | <0.5 | R         |
| B-1207/18    | N       | >32                    | 8   | >64 | <4  | 32  | 4   | <8  | <1  | <0.5 | <1  | <0.5 | <0.5 | <0.25 | 4   | <1  | <1  | <2  | <20  | 32   | <0.5 | R         |
| B-1636/18    | R       | >32                    | 4   | 2   | <4  | <1  | <1  | <8  | <1  | <0.5 | <1  | <0.5 | <0.5 | <0.25 | 4   | <1  | <1  | <2  | <20  | 64   | <0.5 | R         |
| B-2523/18    | R       | >32                    | 4   | 2   | <4  | <1  | <1  | <8  | <1  | <0.5 | <1  | <0.5 | <0.5 | <0.25 | 4   | <1  | <1  | <2  | <20  | 32   | <0.5 | R         |
| B-3002K/17   | A       | >32                    | >32 | >64 | >64 | >64 | >64 | >64 | >64 | >8   | <1  | >16  | >8   | >4    | >64 | <1  | >16 | 8   | >320 | >512 | <0.5 | XDR       |
| B-3060K/17   | A       | >32                    | >32 | >64 | >64 | >64 | >64 | >64 | >64 | >8   | <1  | >16  | >8   | >4    | >64 | <1  | >16 | 8   | >320 | >512 | <0.5 | XDR       |
| B-2016K/17   | A       | >32                    | >32 | >64 | >64 | >64 | >64 | >64 | >64 | >8   | <1  | >16  | >8   | >4    | >64 | <1  | >16 | 8   | >320 | >512 | <0.5 | XDR       |
| B-3299/17    | A       | >32                    | >32 | >64 | >64 | >64 | >64 | >64 | >64 | >8   | <1  | >16  | >8   | >4    | >64 | <1  | >16 | 8   | >320 | >512 | <0.5 | XDR       |
| B-1040/18-1  | I       | >32                    | >32 | 16  | <4  | <1  | <1  | <8  | <1  | 2    | <1  | 2    | 1    | >4    | >64 | >16 | >16 | <2  | 80   | 256  | <0.5 | XDR       |
| B-792/18     | I       | >32                    | >32 | 16  | 16  | <1  | <1  | 16  | <1  | 4    | 2   | 2    | 1    | >4    | 32  | <1  | <1  | <2  | <20  | >512 | <0.5 | XDR       |
| B-853/18-1   | I       | >32                    | >32 | 16  | >64 | <1  | <1  | 32  | <1  | >8   | >16 | <0.5 | <0.5 | >4    | 16  | <1  | <1  | <2  | <20  | >512 | <0.5 | XDR       |
| B-1214/18-2  | F       | >32                    | >32 | >64 | <4  | >64 | >64 | 16  | 32  | <0.5 | <1  | >16  | 2    | >4    | 4   | <1  | 8   | <2  | >320 | 64   | <0.5 | MDR       |
| B-789/18-1   | E       | >32                    | >32 | >64 | >64 | >64 | >64 | >64 | >64 | >8   | <1  | >16  | 1    | >4    | 16  | >64 | >16 | 8   | >320 | 256  | <0.5 | XDR       |
| B-851/18-1   | E       | >32                    | >32 | >64 | >64 | >64 | >64 | >64 | >64 | >8   | <1  | >16  | 1    | >4    | 16  | >64 | >16 | 16  | >320 | 256  | <0.5 | XDR       |
| B-790/18-1   | G       | >32                    | >32 | 16  | >64 | <1  | <1  | 32  | <1  | >8   | >16 | 2    | 1    | >4    | >64 | >16 | >16 | <2  | 80   | 256  | <0.5 | XDR       |
| B-823/18-1   | G       | >32                    | >32 | 16  | >64 | <1  | <1  | 16  | <1  | >8   | >16 | 2    | <0.5 | >4    | >64 | >16 | >16 | <2  | 80   | 256  | <0.5 | XDR       |
| B-702/18     | C       | >32                    | >32 | >64 | >64 | >64 | >64 | >64 | >64 | ND   | 8   | >16  | >8   | >4    | >64 | <1  | >16 | ND  | >320 | >512 | <0.5 | XDR       |
| B-771/18     | B       | >32                    | >32 | 16  | 32  | <1  | <1  | 32  | <1  | >8   | >16 | 2    | 2    | >4    | >64 | >16 | >16 | <2  | 80   | >512 | <0.5 | XDR       |
| B-102/19     | T       | >32                    | >32 | >64 | >64 | ND  | <1  | >64 | 2   | >8   | 8   | >16  | >8   | >4    | >64 | >16 | >16 | >64 | >320 | >512 | <0.5 | XDR       |

|             |   |     |     |     |     |     |     |     |    |    |     |   |      |    |     |     |     |    |     |      |      |     |
|-------------|---|-----|-----|-----|-----|-----|-----|-----|----|----|-----|---|------|----|-----|-----|-----|----|-----|------|------|-----|
| B-543/18    | H | >32 | >32 | >64 | >64 | <1  | <1  | 32  | <1 | >8 | >16 | 4 | 1    | >4 | >64 | >16 | >16 | <2 | 40  | >512 | <0.5 | XDR |
| B-587/18    | H | >32 | >32 | 16  | >64 | <1  | <1  | 32  | <1 | >8 | >16 | 4 | 1    | >4 | >64 | >16 | >16 | <2 | 80  | >512 | <0.5 | XDR |
| B-775/18-1  | H | >32 | >32 | 4   | <4  | <1  | <1  | <8  | <1 | 4  | <1  | 1 | 1    | >4 | >64 | >16 | >16 | <2 | 80  | >512 | <0.5 | XDR |
| B-691/18-4  | H | >32 | >32 | 16  | >64 | <1  | <1  | 32  | <1 | >8 | 2   | 1 | <0.5 | >4 | 32  | <1  | <1  | <2 | <20 | >512 | <0.5 | XDR |
| B-1363/18-1 | O | >32 | >32 | >64 | >64 | >64 | >64 | >64 | 16 | >8 | >16 | 8 | 2    | >4 | 8   | <1  | >16 | 16 | <20 | 256  | <0.5 | XDR |

Abbreviation: AMP, ampicillin; SAM, ampicillin-sulbactam; CXM, cefuroxime; FOX, cefoxitin; CRO, ceftriaxone; CAZ, ceftazidime; SCF, cefoperazone-sulbactam; FEP, cefepime; ETP, ertapenem; IPM, imipenem; TET, tetracycline; TGC, tigecycline; CIP, ciprofloxacin; CHL, chloramphenicol; GEN, gentamicin; TOB, tobramycin; AMK, amikacin; SXT, trimethoprim-sulfamethoxazole; NIT, nitrofurantoin; CST, colistin; R, resistance; MDR, multi drug-resistance; XDR, extensively drug-resistant; green color, sensitive; yellow color, intermediate; pink color, resistant; ND, no data.
